# Supplementary material for: Adaptive and optimized COVID-19 vaccination strategies across geographical regions and age groups
Source: PubMed Central journal article supplement (PMC9017881; doi:10.1371/journal.pcbi.1009974), 2022-04-07
Supplement: pcbi.1009974.s001.pdf [file pcbi.1009974.s001.pdf]

# Supplementary information

## 1 Heuristic vaccination strategies

We first analyse the different heuristic vaccination strategies to assess their impact on the development of the epidemic. Specifically, we construct different scenarios that determine the number of vaccines  $v_k(t)$  that each region  $k$  will receive on day  $t$  depending on the number of infections and/or hospitalizations. Then, the vaccines  $v_k(t)$  are distributed within the region in an age-prioritized strategy from old to younger age groups. We can obtain  $v_k(t)$  in the following way

$$v_k(t) = v(t) \left( w_1 \frac{N_k}{\sum_k N_k} + w_2 \frac{I_k^D(t)}{\sum_k I_k^D(t)} + w_3 \frac{H_k^D(t)}{\sum_k H_k^D(t)} \right),$$

where  $v(t)$  is the overall national number of available vaccine doses on day  $t$ ,  $w_1$ ,  $w_2$ , and  $w_3$  are tunable weight parameters of the strategy ( $\sum_i w_i = 1$ ),  $I_k^D(t)$  is the number of new infections, and  $H_k^D(t)$  is the total hospital occupation in region  $k$  over the last  $D$  days. In our work we set  $D = 14$  to capture the changes over two weeks starting from the initial date. The total number of new infections in region  $k$  in the last  $D$  days is computed by

$$I_k^D(t) = \int_{t-D}^t \sum_{g=1}^G \frac{1}{T_E} E_{kg}(t) dt,$$

and similarly the number of hospitalized individuals is computed by

$$H_k^D(t) = \int_{t-D}^t \sum_{g=1}^G \left( H_{kg}^w(t) + H_{kg}^c(t) + H_{kg}^r(t) \right) dt.$$

Note that, since we want  $H_k^D(t)$  to reflect the total hospital occupation at time  $t$  for region  $k$ , an individual may be counted more than once. One at day  $t$ , another at  $t - 1$  and so on. As long as the individuals remain in the hospital they will be counted.

Different vaccination strategies can be obtained by changing the weights  $w_i$ , e.g. setting  $w_1 = 1$  and  $w_2 = w_3 = 0$  corresponds to the baseline strategy **Pop** where vaccines are equally distributed according to the population density.

## 2 Numerical discretization of optimal control problems

In this section we describe the numerical approach to solving a general optimal control problem via Pontryagin's Maximum Principle [1, 2].

Let  $\mathbf{x}(t) = [x_1(t), x_2(t), \dots, x_n(t)]^\top \in \mathbb{R}^n$  be a state vector and  $\mathbf{u}(t) = [u_1(t), u_2(t), \dots, u_r(t)]^\top \in \mathbb{R}^r$  be a control vector. Consider the following optimal control problem: find  $\mathbf{u}(t)$  to minimize

$$J(\mathbf{u}) = \int_0^{t_f} g(\mathbf{x}(t), \mathbf{u}(t), t) dt \quad (2.1)$$

subject to the state equations

$$\dot{\mathbf{x}}(t) = f(\mathbf{x}(t), \mathbf{u}(t), t), \quad \mathbf{x}(0) = \mathbf{x}_0 \quad (2.2)$$

and the constraint

$$\mathbf{a} \leq \mathbf{u}(t) \leq \mathbf{b}.$$

In order to state the Maximum Principle we define a Hamiltonian as

$$\mathcal{H}(\mathbf{x}(t), \mathbf{u}(t), t) = g(\mathbf{x}(t), \mathbf{u}(t), t) + \mathbf{q}^\top(t) f(\mathbf{x}(t), \mathbf{u}(t), t), \quad (2.3)$$

where  $\mathbf{q}(t)$  are the time-dependent Lagrange multipliers [1]. The goal now is to find an optimal trajectory  $\mathbf{x}(t)$ , an optimal control  $\mathbf{u}(t)$  and an optimal set of Lagrange multipliers  $\mathbf{q}(t)$  so that to minimize the objective function in (2.1).

From the Hamiltonian (2.3) and Pontryagin's Maximum Principle, we obtain the following theorem [1].

**Theorem 1.** *If  $\mathbf{x}^*(t), \mathbf{u}^*(t), t \in [0, t_f]$  is an optimal state-control trajectory starting at  $\mathbf{x}(0)$ , then there exist Lagrange multipliers  $\mathbf{q}^*(t)$  such that*

$$\begin{aligned} \dot{\mathbf{x}}(t) &= \frac{\partial \mathcal{H}}{\partial \mathbf{x}} = f(\mathbf{x}(t), \mathbf{u}(t), t), \quad \mathbf{x}(0) = \mathbf{x}_0, \\ -\dot{\mathbf{q}}(t) &= \frac{\partial \mathcal{H}}{\partial \mathbf{q}} = g_x(\mathbf{q}(t), \mathbf{u}(t), t) + \mathbf{q}^\top(t) f_x(\mathbf{q}(t), \mathbf{u}(t), t), \quad \mathbf{q}(t_f) = 0, \\ \mathcal{H}(x^*(t), u^*(t), q^*(t), t) &= \arg \min_{u(t)} \mathcal{H}(x^*(t), u(t), q^*(t), t). \end{aligned} \quad (2.4)$$

For a given initial value  $x_0 \in \mathbb{R}^n$ , the numerical approach now consists of finding functions  $\mathbf{x} : [0, t_f] \mapsto \mathbb{R}^n$ ,  $\mathbf{u} : [0, t_f] \mapsto \mathbb{R}^r$  and  $\mathbf{q} : [0, t_f] \mapsto \mathbb{R}^n$  satisfying the optimality system (2.4). The numerical algorithm consists of the following steps:

**Step 1:** Subdivide the interval  $[0, t_f]$  into  $N$  equal sub-intervals and assume a piecewise-constant control  $\mathbf{u}^{(0)}(t) = \mathbf{u}^{(0)}(t_k)$ ,  $t \in [t_k, t_{k+1}]$ ,  $k = 0, 1, \dots, N-1$

**Step 2:** Integrate the state equations forward in time for the assumed control  $\mathbf{u}^{(i)}$  and store the trajectory  $\mathbf{x}^{(i)}$

**Step 3:** Compute  $\mathbf{q}^{(i)}$  by solving the second equation in (2.4) backwards in time

**Step 4:** Compute a new control  $\mathbf{u}^{i+1}$  by solving a finite-dimensional nonlinear optimization problem using a sequential least squares programming algorithm

**Step 5:** Compute  $\mathbf{x}^{(i+1)}$  and  $\mathbf{q}^{(i+1)}$  for the new control variable as in Steps 2 and 3

**Step 6:** Compute the values  $J^{(i)}(\mathbf{u}^{(i)}, \mathbf{x}^{(i)})$  and  $J^{(i+1)}(\mathbf{u}^{(i+1)}, \mathbf{x}^{(i+1)})$

**Step 7:** If

$$|J^{(i+1)} - J^{(i)}| \leq \epsilon \quad (2.5)$$

stop the iterative procedure. Here  $\epsilon$  is a small positive constant used as a tolerance.

If (2.5) is not satisfied, replace  $\mathbf{u}^{(i)}$  with  $\mathbf{u}^{(i+1)}$ ,  $\mathbf{x}^{(i)}$  with  $\mathbf{x}^{(i+1)}$ ,  $\mathbf{q}^{(i)}$  with  $\mathbf{q}^{(i+1)}$  and return to Step 4.

### 3 Different type of vaccines

In this section we investigate the sensitivity of the optimization algorithm to different levels of the vaccine efficacy  $e$ , reduction in susceptibility  $\omega$  and protection against developing severe illness  $\pi$ . We set  $e = 0.5, 0.7, 0.9$ ,  $\omega = 0, 0.2, 0.6$  and  $\pi = 0, 0.2, 0.6$  and test the robustness of the optimized strategies with respect to different combinations of these parameters. Let

$$P = \{0.5, 0.7, 0.9\} \times \{0.0, 0.2, 0.6\} \times \{0.0, 0.2, 0.6\} \quad (3.1)$$

be a Cartesian product representing the set of all combinations for the different values of the parameters  $e, \omega, \pi$ . Let  $S_k$  be the optimized strategy obtained for  $P_k \in P$ ,  $k = 1, 2, \dots, 27$ . We investigate the difference between the optimized vaccination strategies, i.e.,

$$\sigma_{kl} = D(P_k, S_k) - D(P_k, S_l), \quad k, l = 1, 2, \dots, 27,$$

where  $D$  is the total number of deaths. Further, we choose the value of the mobility parameter  $\tau = 0.5$ . Taking the max norm of the  $\Sigma = (\sigma_{kl}) \in \mathbb{R}^{27 \times 27}$  matrix, we get

$$\|\Sigma\|_{\max} = \max_{kl} (|\sigma_{kl}|) = 0.82.$$

Hence the difference in the total number of deaths is less than 1 individual and the performance of the optimized strategies is the same for combinations for the different values of the parameters. Further, Figs M and N in S2 file verify that the optimization algorithm is robust to different values of the parameters  $e, \omega, \pi$  since the optimized strategies are similar. The algorithm is expected to be robust against changes in the model parameters concerning the efficacy of the vaccine or protection of the vaccine against severe illness since the gradient of the optimization algorithm does not explicitly depend on these parameters.

## 4 Data and parameters

### 4.1 Demographic data for Finland

### 4.2 Initial conditions

We obtain the initial conditions from data trying to mimic the pandemic situation in Finland as of 18 April 2021. More specifically, we calculate the initial conditions for the compartments in [Table D](#)

|       | 0-9    | 10-19  | 20-29  | 30-39  | 40-49  | 50-59  | 60-69  | 70-79  | 80+    | Total   |
|-------|--------|--------|--------|--------|--------|--------|--------|--------|--------|---------|
| HYKS  | 221613 | 238313 | 272674 | 316173 | 285988 | 289128 | 256006 | 212089 | 106198 | 2198182 |
| TYKS  | 82812  | 93001  | 103572 | 106093 | 101979 | 111874 | 113383 | 99917  | 56373  | 869004  |
| TAYS  | 88071  | 100864 | 105275 | 112809 | 106951 | 115157 | 117896 | 100045 | 55613  | 902681  |
| KYS   | 71910  | 84213  | 92466  | 91390  | 85302  | 103387 | 119723 | 95591  | 53252  | 797234  |
| OYS   | 80308  | 91471  | 84511  | 88448  | 82348  | 91225  | 100322 | 75669  | 42261  | 736563  |
| Total | 544714 | 607862 | 658498 | 714913 | 662568 | 710771 | 707330 | 583311 | 313697 | 5503664 |

Table A: Population size by region and age in mainland Finland on 31 Dec 2020. Obtained from [3].

|       | 0-9  | 10-19 | 20-29 | 30-39 | 40-49 | 50-59 | 60-69 | 70-79 | 80+  |
|-------|------|-------|-------|-------|-------|-------|-------|-------|------|
| 0-9   | 4.61 | 1.24  | 0.81  | 1.71  | 1.08  | 0.63  | 0.58  | 0.15  | 0.08 |
| 10-19 | 1.10 | 7.83  | 0.97  | 1.02  | 1.83  | 0.71  | 0.35  | 0.13  | 0.07 |
| 20-29 | 0.71 | 0.95  | 3.87  | 1.84  | 1.51  | 1.41  | 0.67  | 0.19  | 0.10 |
| 30-39 | 1.51 | 1.01  | 1.86  | 3.25  | 2.24  | 1.97  | 1.18  | 0.21  | 0.12 |
| 40-49 | 0.82 | 1.57  | 1.33  | 1.94  | 3.18  | 2.24  | 1.02  | 0.29  | 0.16 |
| 50-59 | 0.45 | 0.57  | 1.16  | 1.60  | 2.09  | 2.91  | 1.71  | 0.26  | 0.14 |
| 60-69 | 0.62 | 0.42  | 0.83  | 1.43  | 1.42  | 2.56  | 2.19  | 0.72  | 0.40 |
| 70-79 | 0.22 | 0.21  | 0.32  | 0.36  | 0.58  | 0.55  | 1.01  | 1.09  | 0.60 |
| 80+   | 0.22 | 0.21  | 0.32  | 0.36  | 0.58  | 0.55  | 1.01  | 1.09  | 0.60 |

Table B: Finnish age contact matrix with 9 age groups and 10y age resolution. The entry on row  $g$  and column  $h$  indicates the estimated daily number of contacts made by a typical individual in age group  $g$  to individuals in age group  $h$  [4].

as follows

$$\begin{aligned}
S_{kg}^u &= N_{kg} - S_{kg}^v - S_{kg}^x - E_{kg} - I_{kg} - Q_{kg}^0 - Q_{kg}^1 - H_{kg}^w - H_{kg}^c - H_{kg}^r - R_{kg} - D_{kg} - V_{kg} \\
S_{kg}^v &= 0 \\
S_{kg}^x &= (1 - e)v_{kg} \\
E_{kg} &= \frac{T_E}{T_I + T_E} i_{kg}^r \\
I_{kg} &= \frac{T_I}{T_I + T_E} i_{kg}^r \\
Q_{kg}^0 &= 0 \\
Q_{kg}^1 &= 0 \\
H_{kg}^w &= h_k \mathcal{H}_g \\
H_{kg}^c &= c_k \mathcal{C}_g \\
H_{kg}^r &= 0 \\
R_{kg} &= r_{kg}^r \\
D_{kg} &= 0 \\
V_{kg} &= e v_{kg},
\end{aligned}$$

where  $v_{kg}$  is the cumulative number of people who have received the first dose of any vaccine until 18 April 2021,  $i_{kg}^r$  stands for the estimated number of real infectious,  $r_{kg}^r$  represents the number of real recovered people as of 18 April,  $h_k$  is the reported individuals in hospital ward,  $c_k$  is the reported individuals in critical care units, and  $\mathcal{H}_g$  and  $\mathcal{C}_g$  are the proportions of people at ward

|      | HYKS      | TYKS    | TAYS    | KYS     | OYS     |
|------|-----------|---------|---------|---------|---------|
| HYKS | 1 389 016 | 7 688   | 16 710  | 7 789   | 1 774   |
| TYKS | 11 316    | 518 173 | 14 139  | 562     | 2 870   |
| TAYS | 22 928    | 12 404  | 511 506 | 4 360   | 1 675   |
| KYS  | 8 990     | 365     | 4 557   | 459 867 | 3 286   |
| OYS  | 1 798     | 2 417   | 1 592   | 3 360   | 407 636 |

Table C: Finnish regional morning (between 6:00–11:59) mobility, averaged over March–May 2019. Rows represent origins and columns represent destinations [5].

Table D: **Epidemiological compartments.** There are  $KG$  copies of each compartment, denoted  $S_{kg}^u, S_{kg}^v, \dots, V_{kg}$  for regions  $k = 1, \dots, K$  and age groups  $g = 1, \dots, G$ .

| Symbol | Description                                                      |
|--------|------------------------------------------------------------------|
| $S^u$  | Susceptible, unvaccinated                                        |
| $S^v$  | Susceptible, invited for vaccination                             |
| $S^x$  | Susceptible, vaccinated with no immunity or declined vaccination |
| $E$    | Infected but not yet infectious                                  |
| $I$    | Infected and infectious                                          |
| $Q^0$  | Quarantined at home, mild disease                                |
| $Q^1$  | Quarantined at home, severe disease                              |
| $H^w$  | hospitalized, in general ward                                    |
| $H^c$  | hospitalized, in critical care                                   |
| $H^r$  | hospitalized, in recovery ward                                   |
| $D$    | Deceased                                                         |
| $R$    | Recovered with full immunity                                     |
| $V$    | Vaccinated with full immunity                                    |

and critical care, respectively. The estimation of real infectious individuals at any day  $t$  is derived directly from data as follows:

$$i_{kg}^r(t) = i_{kg}^d(t) + i_{kg}^u(t),$$

where the number of undetected infectious people  $i_{kg}^u(t)$  come from upscaling the number of detected individuals  $i_{kg}^d(t)$  by a factor that depends on the index of age group  $g$ , i.e.,

$$i_{kg}^u(t) = (1 + 9g^{-2.46})i_{kg}^d(t).$$

The number of detected infectious people is calculated by summing the reported cases over the last  $T_I + T_E$  days,

$$i_{kg}^d(t) = \sum_{\omega=\omega_0}^t i_k^d(\omega) \mathcal{I}_g^w(\omega),$$

where  $\omega_0 = t - T_I - T_E$ ,  $i_k^d(t)$  is the number of cases in region  $k$  reported by THL (Finnish Institute of Health and Welfare) at day  $t$ , and  $\mathcal{I}_g^w(t)$  is the proportion of infected people in age group  $g$ . We do not have daily counts as THL does not provide these on infected people per age group. We have

chosen 18 April 2021 as the start day since it is a Sunday, and the weekly proportion  $\mathcal{I}_g^w(t)$  is the same for all the sums ( $T_I + T_E = 7$  days, 1 week), which gives

$$i_{kg}^d(t) = \mathcal{I}_g^w \sum_{\omega=\omega_0}^t i_k^d(\omega).$$

The numerical value for  $\mathcal{I}_g^w$  can be found in Table E and for the result of the summation  $\sum_{\omega} i_k^d(\omega)$  see Table F. The estimation of real recovered people at day  $t$  is similar,

$$\begin{aligned} r_{kg}^r(t) &= r_{kg}^d(t) + r_{kg}^u(t) \\ r_{kg}^u(t) &= (1 + 9g^{-2.46})r_{kg}^d(t) \\ r_{kg}^d(t) &= \sum_{\omega=0}^{t-(T_I+T_E)} i_k^d(\omega)\mathcal{I}_g^w(\omega) \end{aligned}$$

in which  $\omega = 0$  marks the beginning of the coronavirus epidemic in Finland. The estimated values at 18 April 2021 of the real infected people  $i_{kg}^r$  and real recovered people  $r_{kg}^r$  can be found in Tables I and J, respectively.

| Parameter           | Description                 | 0–9    | 10–19  | 20–29  | 30–39  | 40–49  | 50–59  | 60–69  | 70–79  | 80+    |
|---------------------|-----------------------------|--------|--------|--------|--------|--------|--------|--------|--------|--------|
| $\mathcal{H}_g^*$   | Proportion in ward          | 0.0058 | 0.0107 | 0.0467 | 0.0605 | 0.0911 | 0.1450 | 0.1547 | 0.2008 | 0.2847 |
| $\mathcal{C}_g^*$   | Proportion in critical care | 0.0038 | 0.0069 | 0.0301 | 0.0390 | 0.0978 | 0.2231 | 0.2891 | 0.2448 | 0.0655 |
| $\mathcal{I}^{w**}$ | Infections                  | 240    | 310    | 354    | 355    | 294    | 200    | 101    | 44     | 31     |
| $\mathcal{I}_g^w$   | Normalized $\mathcal{I}^w$  | 0.1244 | 0.1607 | 0.1835 | 0.1840 | 0.1524 | 0.1037 | 0.0524 | 0.0228 | 0.0161 |

Table E: Parameters for age compartments.

\* From [6].

\*\* Reported number of infected people in Finland by age group during 12–18 April 2021 [7].

| Parameter                       | Description   | HYKS | TYKS | TAYS | KYS | OYS | Total |
|---------------------------------|---------------|------|------|------|-----|-----|-------|
| $h_k^*$                         | Ward          | 88   | 11   | 17   | 5   | 11  | 132   |
| $c_k^*$                         | Critical care | 21   | 6    | 2    | 5   | 0   | 34    |
| $\sum_{\omega} i_k^d(\omega)**$ | Infectious    | 1179 | 347  | 225  | 80  | 76  | 1907  |

Table F: Parameters estimated from data

\* Numbers reported by [8] on 19 April 2021.

\*\* Sum of reported number of infected people by region from 12–18 April 2021 [7].

| $v_{kg}$         | HYKS   | TYKS   | TAYS   | KYS    | OYS    | Total   | Total/ $N_g$ (%) |
|------------------|--------|--------|--------|--------|--------|---------|------------------|
| 0-9              | 0      | 0      | 0      | 0      | 0      | 0       | 0                |
| 10-19            | 1802   | 895    | 647    | 467    | 397    | 4208    | 0.69             |
| 20-29            | 14326  | 6391   | 4806   | 4111   | 3570   | 33204   | 5.04             |
| 30-39            | 22284  | 8958   | 7639   | 6314   | 5640   | 50835   | 7.11             |
| 40-49            | 32713  | 12418  | 11718  | 8261   | 7842   | 72952   | 11.01            |
| 50-59            | 53123  | 20671  | 20143  | 15545  | 14676  | 124158  | 17.47            |
| 60-69            | 111319 | 46461  | 47329  | 40640  | 33953  | 279702  | 39.54            |
| 70-79            | 184419 | 87350  | 85498  | 79872  | 63631  | 500770  | 85.85            |
| 80+              | 94809  | 50321  | 49239  | 47561  | 37125  | 279055  | 88.96            |
| Total            | 514795 | 233465 | 227019 | 202771 | 166834 | 1344884 | 24.44            |
| Total/ $N_k$ (%) | 23.42  | 26.87  | 25.15  | 25.43  | 22.65  | 24.44   |                  |

Table G: Number of vaccinated people in Finland by region with 9 age groups and 10y age resolution as of 18 April 2021. The entry on row  $g$  and column  $k$  indicates the number of individuals who have received the first dose in age group  $g$  and region  $k$ . Data from [7].

| $S_{kg}^u$       | HYKS       | TYKS      | TAYS      | KYS       | OYS       | Total      | Total/ $N_g$ (%) |
|------------------|------------|-----------|-----------|-----------|-----------|------------|------------------|
| 0-9              | 171581.02  | 70816.88  | 81903.12  | 67257.71  | 76718.73  | 468277.46  | 85.97            |
| 10-19            | 209955.74  | 85708.42  | 96837.14  | 80990.48  | 88887.55  | 562379.33  | 92.52            |
| 20-29            | 228534.80  | 89876.46  | 96665.64  | 85189.05  | 78392.50  | 578658.45  | 87.88            |
| 30-39            | 270855.73  | 91783.82  | 102310.14 | 82761.97  | 80860.11  | 628571.77  | 87.92            |
| 40-49            | 235429.06  | 85427.65  | 93018.80  | 75258.19  | 73005.88  | 562139.57  | 84.84            |
| 50-59            | 221934.99  | 88013.76  | 93279.21  | 86411.78  | 75323.60  | 564963.33  | 79.49            |
| 60-69            | 137785.90  | 65351.37  | 69714.24  | 78372.62  | 65760.56  | 416984.69  | 58.95            |
| 70-79            | 24360.73   | 11823.42  | 14133.96  | 15379.26  | 11743.93  | 77441.30   | 13.28            |
| 80+              | 8689.93    | 5505.76   | 6064.27   | 5424.06   | 4885.78   | 30569.80   | 9.75             |
| Total            | 1509127.92 | 594307.53 | 653926.52 | 577045.10 | 555578.63 | 3889985.71 | 70.68            |
| Total/ $N_k$ (%) | 68.65      | 68.39     | 72.44     | 72.38     | 75.43     | 70.68      |                  |

Table H: Number of susceptible people in Finland by region with 9 age groups and 10y age resolution as of 18 April 2021. The entry on row  $g$  and column  $k$  indicates the number of individuals who are susceptible in age group  $g$  and region  $k$ .

| $i_{kg}^r$       | HYKS    | TYKS    | TAYS   | KYS    | OYS    | Total   | Total/ $N_g$ (%) |
|------------------|---------|---------|--------|--------|--------|---------|------------------|
| 0-9              | 1613.56 | 473.53  | 307.93 | 110.86 | 102.64 | 2608.52 | 0.48             |
| 10-19            | 688.86  | 202.16  | 131.46 | 47.33  | 43.82  | 1113.63 | 0.18             |
| 20-29            | 563.26  | 165.30  | 107.49 | 38.70  | 35.83  | 910.58  | 0.14             |
| 30-39            | 498.45  | 146.28  | 95.12  | 34.24  | 31.71  | 805.81  | 0.11             |
| 40-49            | 390.24  | 114.52  | 74.47  | 26.81  | 24.82  | 630.87  | 0.10             |
| 50-59            | 257.88  | 75.68   | 49.21  | 17.72  | 16.40  | 416.90  | 0.06             |
| 60-69            | 128.09  | 37.59   | 24.45  | 8.80   | 8.15   | 207.08  | 0.03             |
| 70-79            | 55.24   | 16.21   | 10.54  | 3.80   | 3.51   | 89.30   | 0.02             |
| 80+              | 38.66   | 11.35   | 7.38   | 2.66   | 2.46   | 62.50   | 0.02             |
| Total            | 4234.25 | 1242.62 | 808.06 | 290.90 | 269.35 | 6845.19 | 0.12             |
| Total/ $N_k$ (%) | 0.19    | 0.14    | 0.09   | 0.04   | 0.04   | 0.12    |                  |

Table I: Estimated number of real infectious people in Finland by region with 9 age groups and 10y age resolution as of 18 April 2021. The entry on row  $g$  and column  $k$  indicates the number of individuals who are infectious in age group  $g$  and region  $k$ .

| $r_{kg}^r$       | HYKS      | TYKS     | TAYS     | KYS      | OYS      | Total     | Total/ $N_g$ (%) |
|------------------|-----------|----------|----------|----------|----------|-----------|------------------|
| 0-9              | 48404.26  | 11519.76 | 5855.94  | 4539.03  | 3486.14  | 73805.15  | 13.55            |
| 10-19            | 25865.12  | 6195.55  | 3247.81  | 2708.32  | 2142.57  | 40159.38  | 6.61             |
| 20-29            | 29244.78  | 7138.85  | 3694.80  | 3127.12  | 2512.22  | 45717.78  | 6.94             |
| 30-39            | 22527.03  | 5203.81  | 2763.23  | 2279.31  | 1915.45  | 34688.83  | 4.85             |
| 40-49            | 17445.50  | 4017.41  | 2137.80  | 1755.16  | 1474.33  | 26830.20  | 4.05             |
| 50-59            | 13794.60  | 3110.75  | 1682.52  | 1410.74  | 1207.43  | 21206.04  | 2.98             |
| 60-69            | 6751.83   | 1529.35  | 824.89   | 699.27   | 598.56   | 10403.91  | 1.47             |
| 70-79            | 3231.19   | 723.73   | 398.56   | 333.74   | 288.36   | 4975.57   | 0.85             |
| 80+              | 2633.95   | 531.39   | 297.37   | 262.54   | 244.63   | 3969.89   | 1.27             |
| Total            | 169898.27 | 39970.61 | 20902.92 | 17115.24 | 13869.71 | 261756.74 | 4.76             |
| Total/ $N_k$ (%) | 7.73      | 4.60     | 2.32     | 2.15     | 1.88     | 4.76      |                  |

Table J: Estimated number of real recovered people in Finland by region with 9 age groups and 10y age resolution as of 18 April 2021. The entry on row  $g$  and column  $k$  indicates the number of individuals who are recovered in age group  $g$  and region  $k$ .



## References

1. Kirk DE. Optimal control theory: An introduction. Courier Corporation; 2004.
2. Macki J, Strauss A. Introduction to Optimal Control Theory. Springer; 2012.
3. Official Statistics of Finland. Population structure database; 2021. Available from: [https://pxnet2.stat.fi/PXWeb/pxweb/en/StatFin/StatFin\\_\\_vrm\\_\\_vaerak/statfin\\_vaerak\\_pxt\\_11re.px/](https://pxnet2.stat.fi/PXWeb/pxweb/en/StatFin/StatFin__vrm__vaerak/statfin_vaerak_pxt_11re.px/).
4. Mossong J, Hens N, Jit M, Beutels P, Auranen K, Mikolajczyk R, et al. Social Contacts and Mixing Patterns Relevant to the Spread of Infectious Diseases. PLOS Medicine. 2008;5(3). doi:10.1371/journal.pmed.0050074.
5. Telia Crowd Insights. Website: <https://www.telia.fi/yrityksille/palvelut/teknologiat/crowd-insights>.
6. Sjödin H, Rocklöv J, Britton T. Evaluating and optimizing COVID-19 vaccination policies: A case study of Sweden. medRxiv. 2021;doi:10.1101/2021.04.07.21255026.
7. Finnish Institute for Health and Welfare (THL). COVID-19 API; 2021. Available from: [https://sampo.thl.fi/pivot/prod/en/epirapo/covid19case/fact\\_epirapo\\_covid19case](https://sampo.thl.fi/pivot/prod/en/epirapo/covid19case/fact_epirapo_covid19case). Instructions: <https://thl.fi/en/web/thlfi-en/statistics/statistical-databases/open-data/confirmed-corona-cases-in-finland-covid-19->.
8. Sanomat H. Helsingin Sanomat, Hospitalized data API; 2021. Available from: <https://w3qa5ydb4l.execute-api.eu-west-1.amazonaws.com/prod/finnishCoronaHospitalData>. Repository: <https://github.com/HS-Datadesk/koronavirus-avoindata>.
