# Supplementary material for: Adaptive and optimized COVID-19 vaccination strategies across geographical regions and age groups
Source: PubMed Central journal article supplement (PMC9017881; doi:10.1371/journal.pcbi.1009974), 2022-04-07
Supplement: pcbi.1009974.s002.pdf [file pcbi.1009974.s002.pdf]

## Time plots for different values of mobility levels

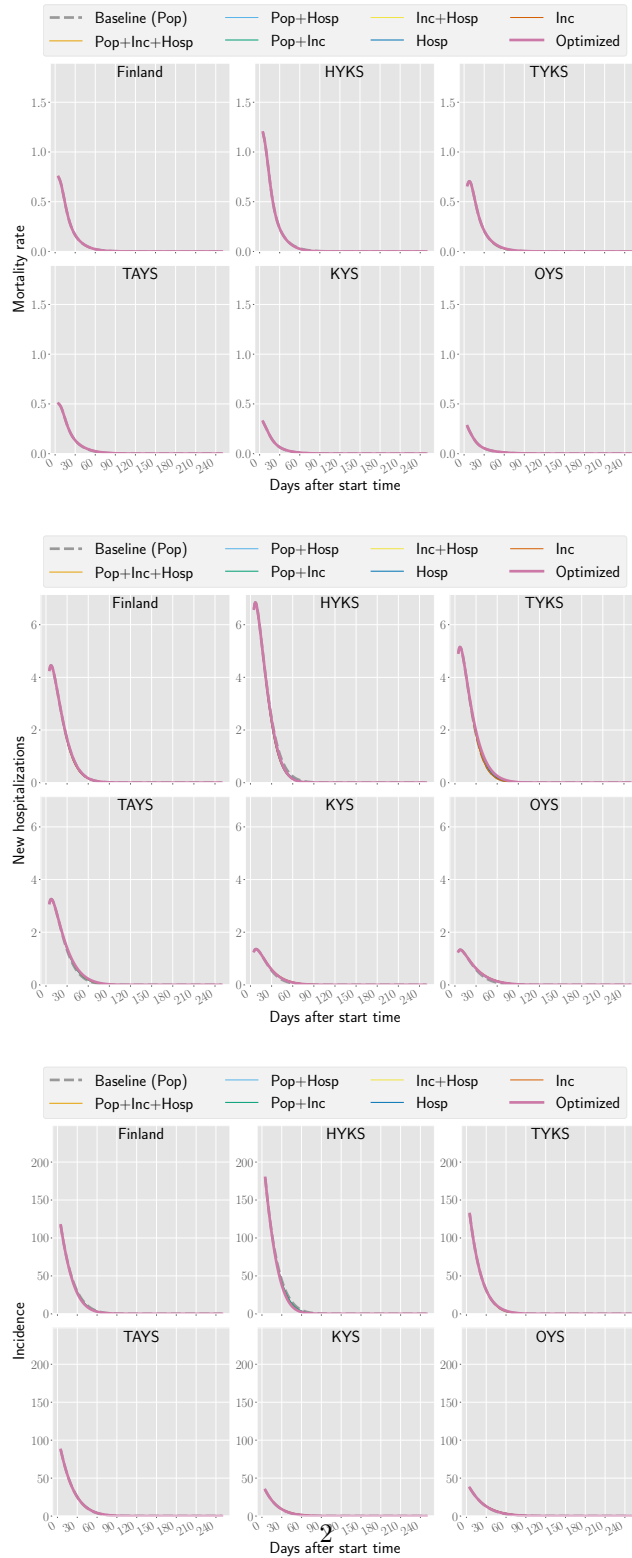

Fig. A: Different metrics per million inhabitants in Finland and the five hospital catchment areas. For these scenarios, the basic reproduction number  $R_{\text{eff}} = 0.75$  and the mobility value  $\tau = 0.0$ .

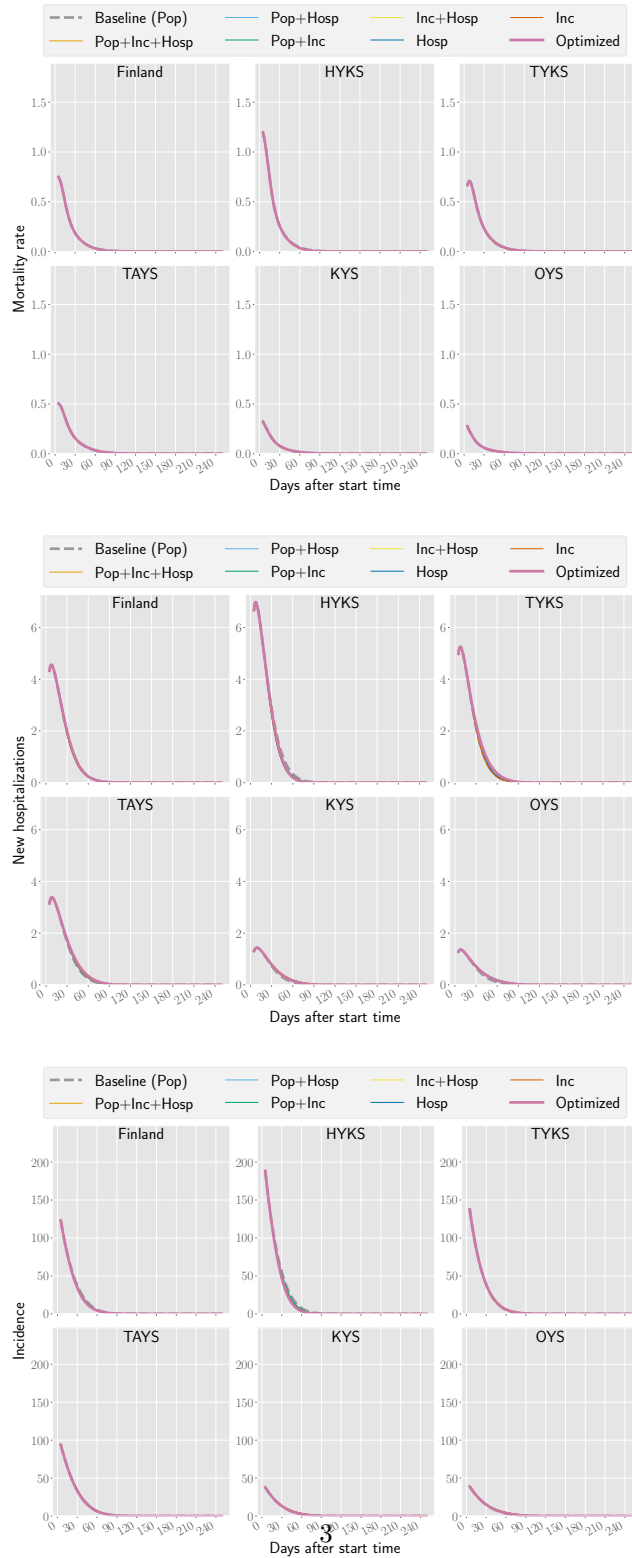

Fig. B: Different metrics per million inhabitants in Finland and the five hospital catchment areas included here for all the vaccination strategies. For these scenarios, the basic reproduction number  $R_{\text{eff}} = 0.75$  and the mobility value  $\tau = 0.5$ .

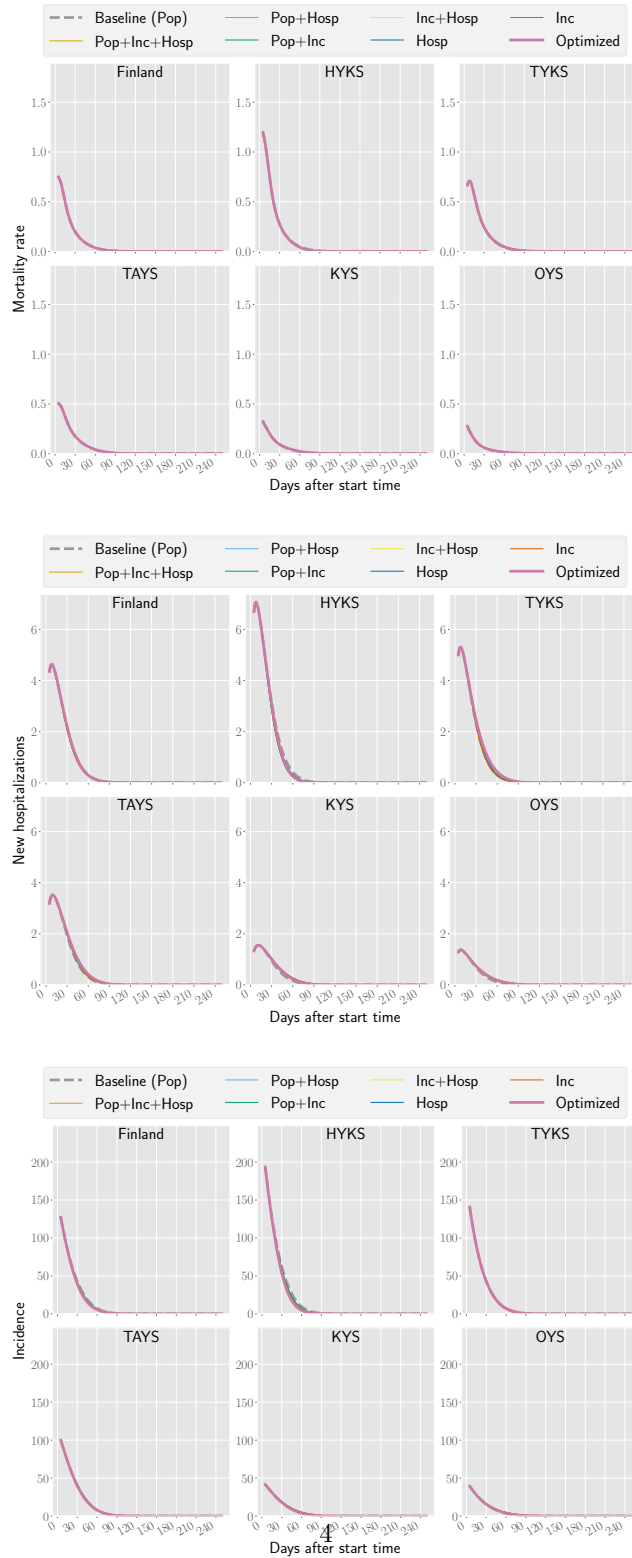

Fig. C: Different metrics per million inhabitants in Finland and the five hospital catchment areas included here for all the vaccination strategies. For these scenarios, the basic reproduction number  $R_{\text{eff}} = 0.75$  and the mobility value  $\tau = 1.0$ .

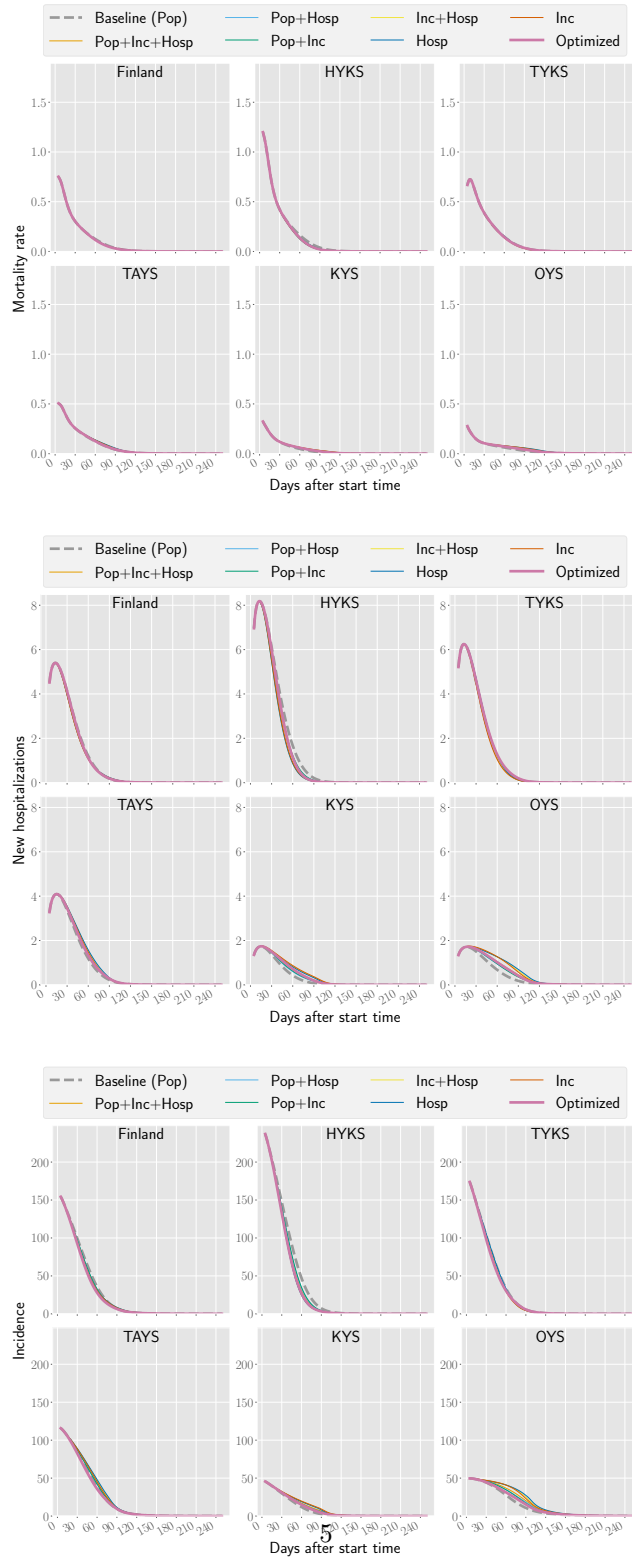

Fig. D: Different metrics per million inhabitants in Finland and the five hospital catchment areas included here for all the vaccination strategies. For these scenarios, the basic reproduction number  $R_{\text{eff}} = 1.0$  and the mobility value  $\tau = 0.0$ .

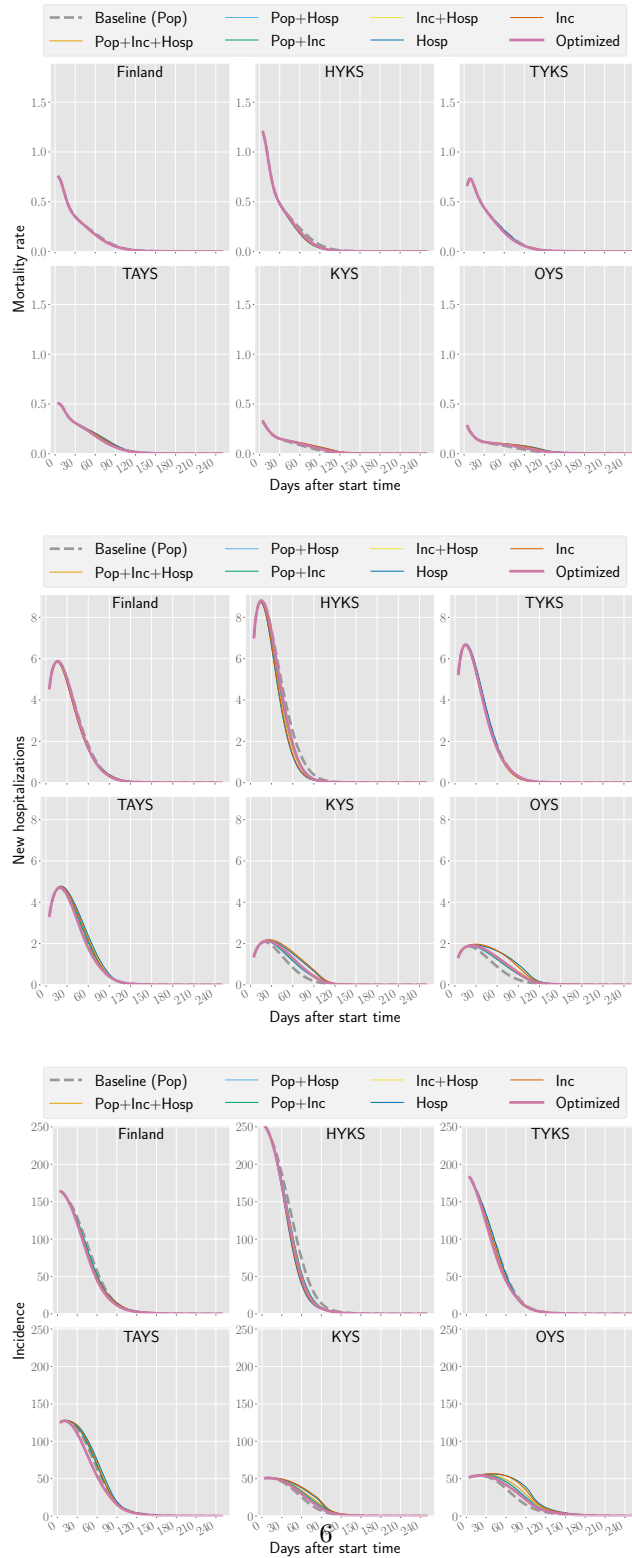

Fig. E: Different metrics per million inhabitants in Finland and the five hospital catchment areas included here for all the vaccination strategies. For these scenarios, the basic reproduction number  $R_{\text{eff}} = 1.0$  and the mobility value  $\tau = 0.5$ .

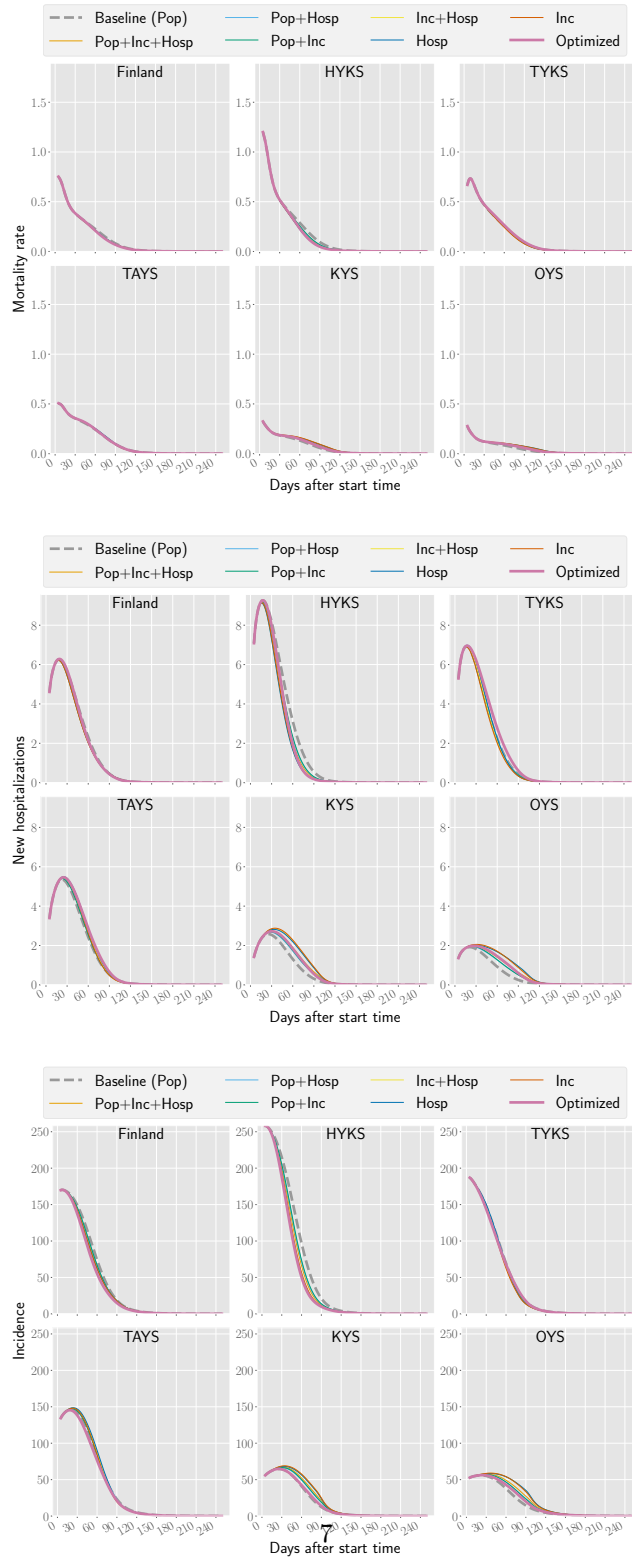

Fig. F: Different metrics per million inhabitants in Finland and the five hospital catchment areas included here for all the vaccination strategies. For these scenarios, the basic reproduction number  $R_{\text{eff}} = 1.0$  and the mobility value  $\tau = 1.0$ .

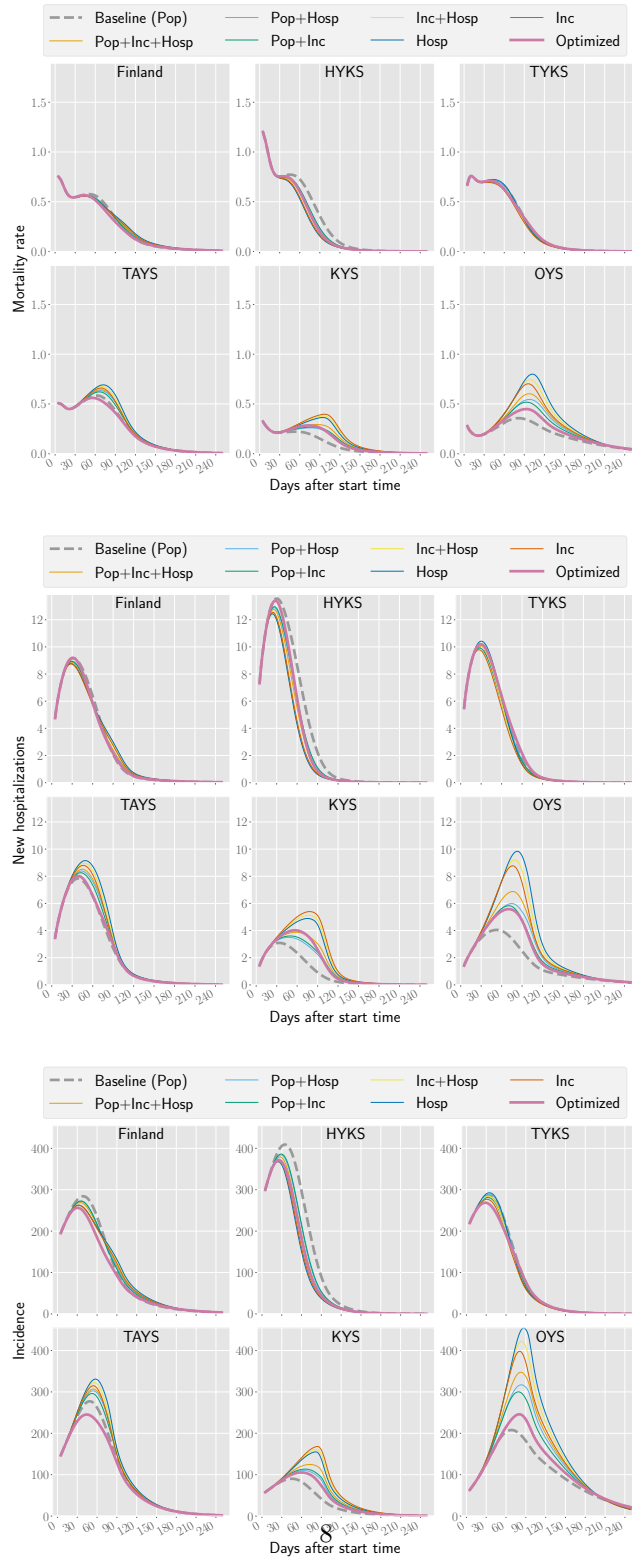

Fig. G: Different metrics per million inhabitants in Finland and the five hospital catchment areas included here for all the vaccination strategies. For these scenarios, the basic reproduction number  $R_{\text{eff}} = 1.25$  and the mobility value  $\tau = 0.0$ .



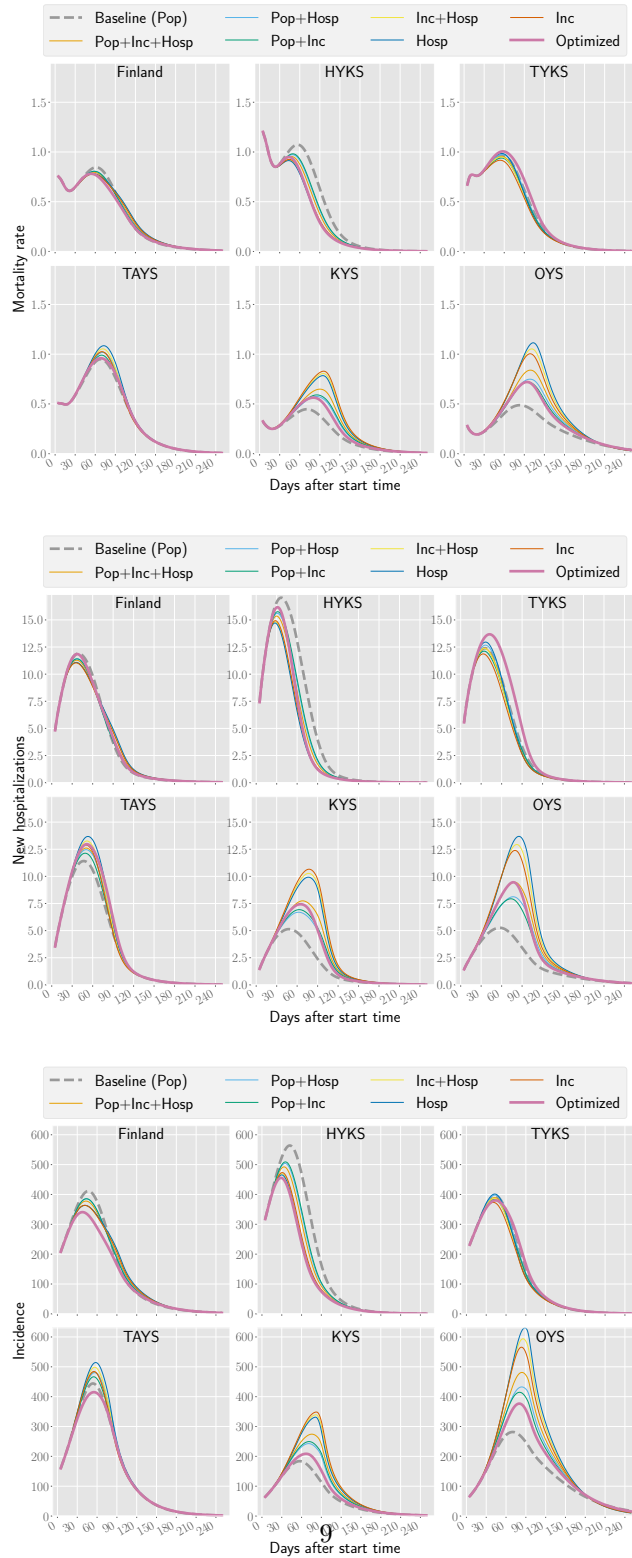

Fig. H: Different metrics per million inhabitants in Finland and the five hospital catchment areas included here for all the vaccination strategies. For these scenarios, the basic reproduction number  $R_{\text{eff}} = 1.25$  and the mobility value  $\tau = 0.5$ .

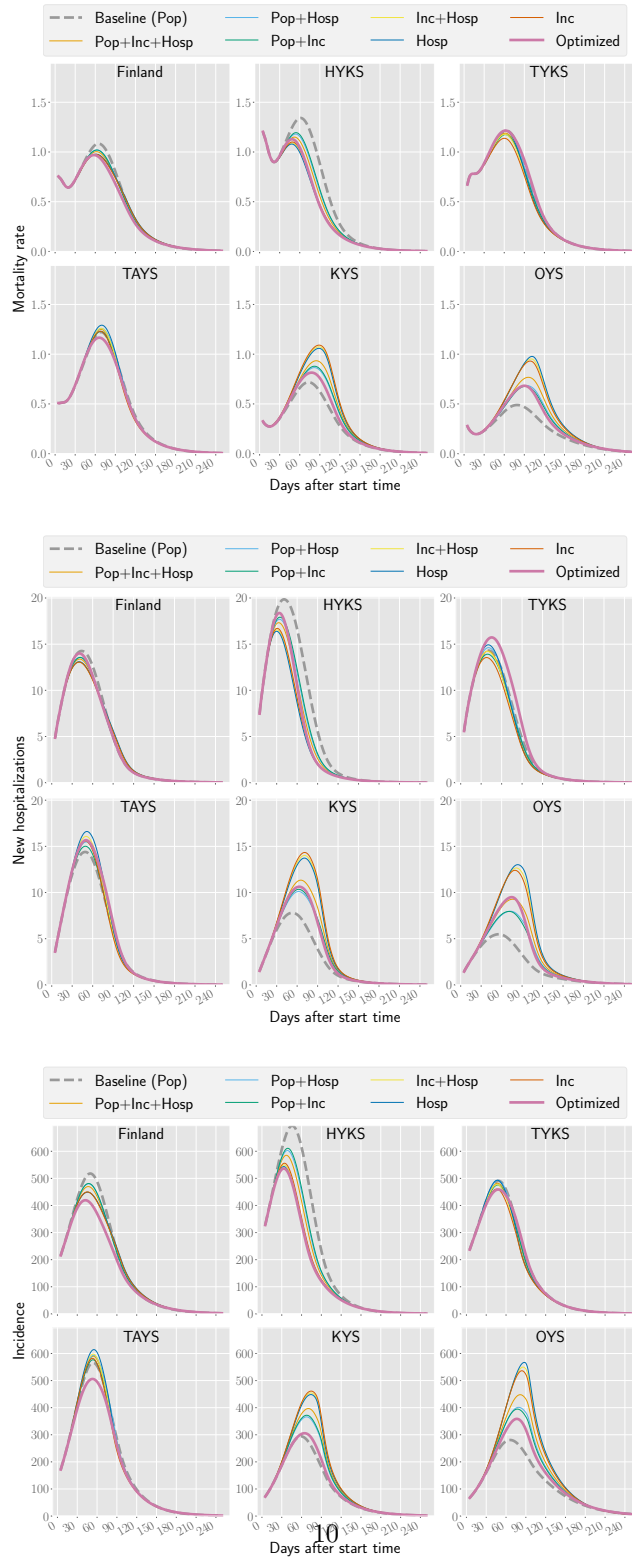

Fig. I: Different metrics per million inhabitants in Finland and the five hospital catchment areas included here for all the vaccination strategies. For these scenarios, the basic reproduction number  $R_{\text{eff}} = 1.25$  and the mobility value  $\tau = 1.0$ .

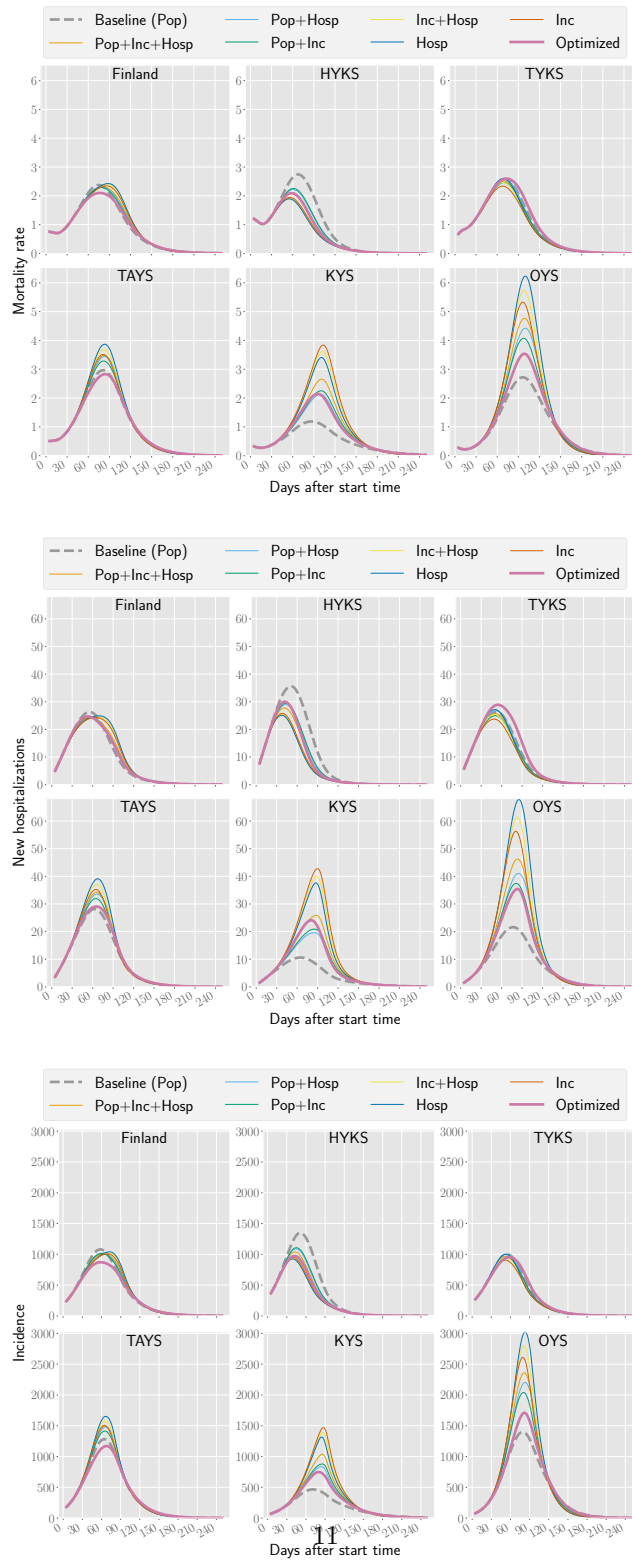

Fig. J: Different metrics per million inhabitants in Finland and the five hospital catchment areas included here for all the vaccination strategies. For these scenarios, the basic reproduction number  $R_{\text{eff}} = 1.5$  and the mobility value  $\tau = 0.0$ .

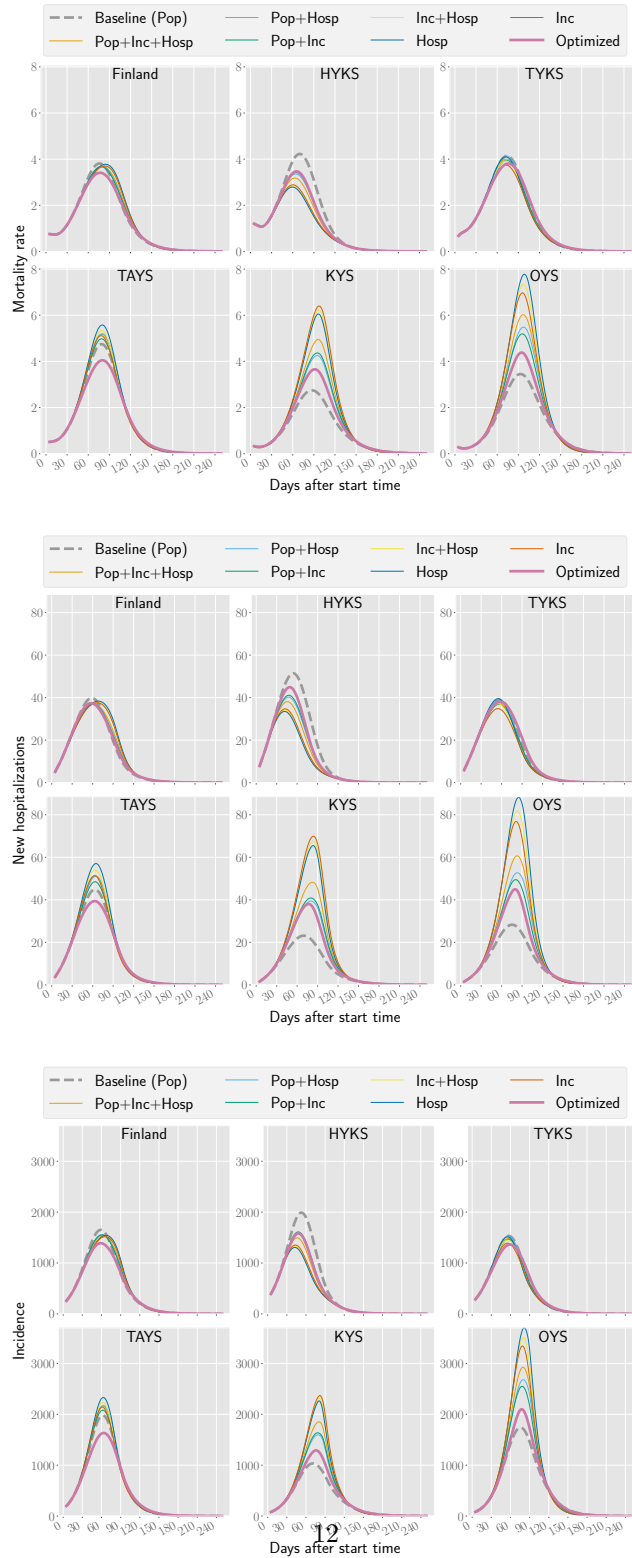

Fig. K: Different metrics per million inhabitants in Finland and the five hospital catchment areas included here for all the vaccination strategies. For these scenarios, the basic reproduction number  $R_{\text{eff}} = 1.5$  and the mobility value  $\tau = 0.5$ .

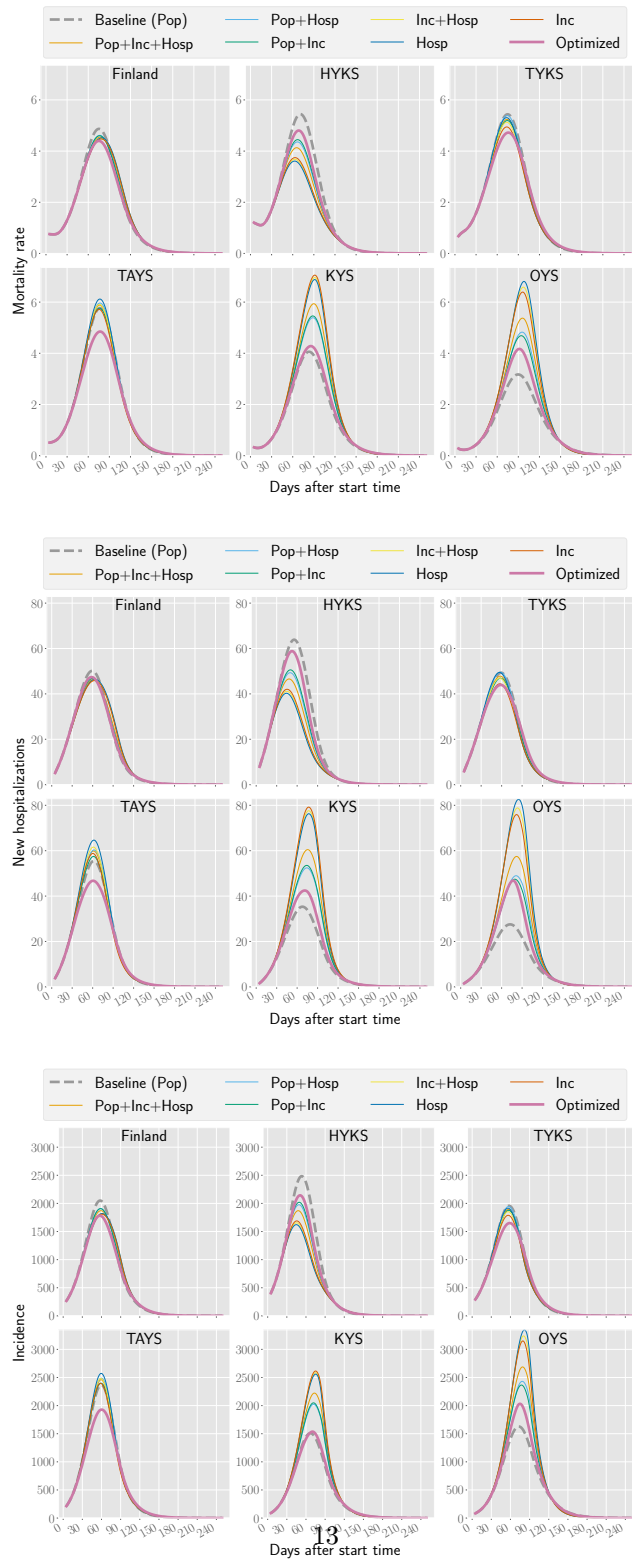

Fig. L: Different metrics per million inhabitants in Finland and the five hospital catchment areas included here for all the vaccination strategies. For these scenarios, the basic reproduction number  $R_{\text{eff}} = 1.5$  and the mobility value  $\tau = 1.0$ .

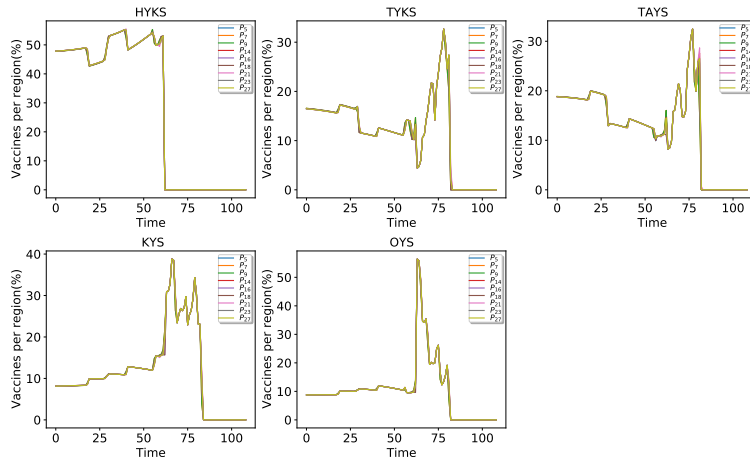

Fig. M: Percentage of vaccine doses allocated by the optimized strategy to regions for different values of  $e, \omega$  and  $\pi$ .

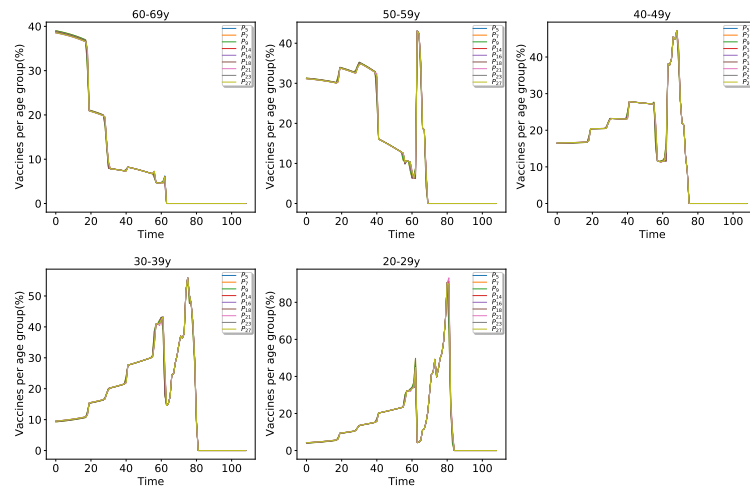

Fig. N: Percentage of vaccine doses allocated by the optimized strategy to age groups for different values of  $e, \omega$  and  $\pi$ . Each  $P_i, i \in \{5, 7, 9, 14, 16, 18, 21, 23, 27\}$  represents a different combination of  $e, \omega$  and  $\pi$  taken from (3.1) in S1 Appendix.

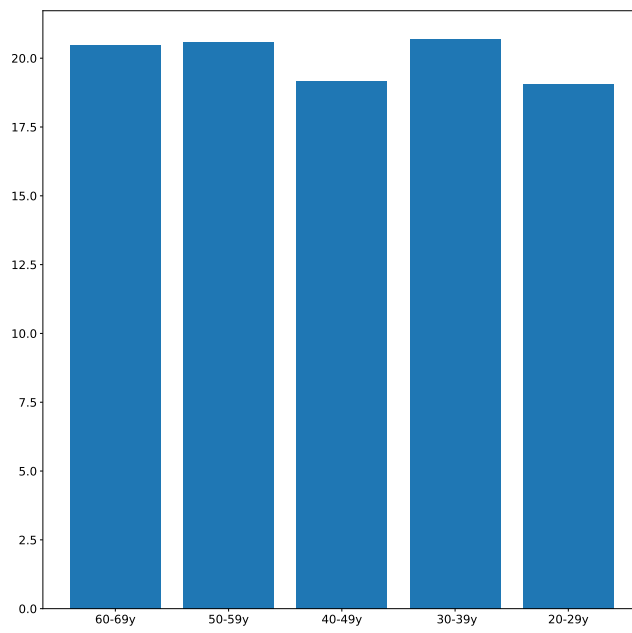

Fig. O: Percentage of vaccines which each age group would receive proportionally to the age group size.
